# Supplementary material
Source: publisher site journal article supplement (https://www.dovepress.com/article/404528)

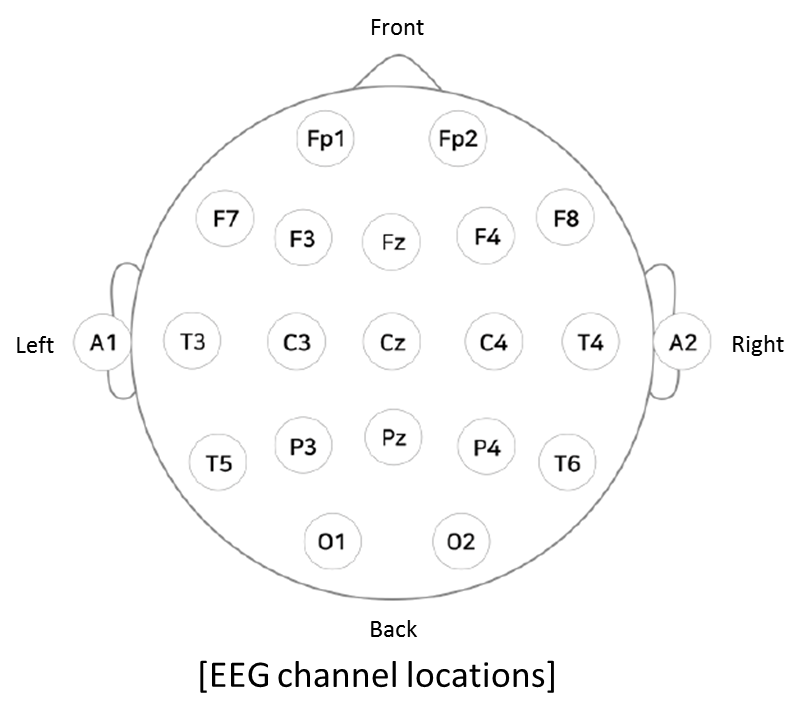


**Supplementary figure 1** 19 Scalp Electrodes Positioned based on the International 10-20 System.

Supplement: Supplementary file 1 [file get_supplementary_file.php]
